# Supplementary material for: Immunoassay of S-adenosylmethionine and S-adenosylhomocysteine: the methylation index as a biomarker for disease and health status
Source: PubMed Central journal article supplement (PMC5127003; doi:10.1186/s13104-016-2296-8), 2016-11-28
Supplement: 13104_2016_2296_MOESM1_ESM.pdf [file 13104_2016_2296_MOESM1_ESM.pdf]

## Information on cases collected from clinical labs

Table 1a Disease and Case Information –Study C

| Disease                    | Case No. |
|----------------------------|----------|
| Cerebrovascular diseases + |          |
| Parkinson's Disease        | 45 + 3   |
| Diabetes                   | 43       |
| High Blood Pressure        | 22       |
| Heart diseases             | 51       |
| Inflammation               | 35       |
| Kidney disease             | 26       |
| Chronic Liver diseases     | 30       |
| Respiratory diseases       | 36       |

Table 1b Cancer and Case Information - Study A

| Cancer             | Case No. |
|--------------------|----------|
| Bladder Cancer     | 2        |
| Breast Cancer      | 3        |
| Colon Cancer       | 16       |
| Esophagus Cancer   | 3        |
| Gallbladder Cancer | 1        |
| Lipoma             | 2        |
| Liver Cancer       | 23       |
| Lung Cancer        | 75       |
| Lymphoma           | 2        |
| Multiple Myeloma   | 1        |
| Ovary Cancer       | 2        |
| Prostate Cancer    | 5        |
| Throat Cancer      | 4        |
| Thymoma            | 1        |
| Thyroid cancer     | 1        |
| Uterus Cancer      | 5        |
| Vascular Cancer    | 1        |
| Cancer             | 27       |

Table 1c Brain Disease Information – Study B

| Disease                                                                        | Case No. |
|--------------------------------------------------------------------------------|----------|
| Cerebrovascular diseases<br>(hemorrhage (10), embolism<br>(6), infarction (4)) | 20       |
| Depression                                                                     | 10       |
| Parkinson's Disease                                                            | 10       |

Inflammation: a collection of benign inflammatory responses and related diseases: Lower limb atherosclerosis obliterans, Infectious mononucleosis, Coagulopathy, Benign prostatic hyperplasia, Arterial embolism, Duodenal ulcer, Reflux esophagitis, Remnant gastritis, Acute gastric infarction, Acute gastroenteritis, Acute pancreatitis, Ankylosing spondylitis, Acute tonsillitis, Scrub typhus (scrub typhus), Chronic gastritis, Gastrointestinal bleeding, Warty stomach (antral), Hydrocele, Intestinal obstruction, Gastroenteritis, Cholecystitis, Pancreatitis, Lumbar disc herniation, Cellulitis, Hemophilia, Thrombocytopenic purpura, Hiatal hernia.

Heart diseases: Coronary heart disease, Chronic respiratory heart disease, Respiratory heart disease

Kidney diseases: Nephritis, Uremia, Chronic renal insufficiency, Urinary stones, Renal insufficiency, Hydronephrosis, Kidney stones, Ureteral stones, Staghorn calculi

Respiratory diseases: Asthma, Asthmatic Pneumonia, Chronic bronchitis, Chronic laryngitis, Chronic obstructive respiratory emphysema, Chronic obstructive respiratory disease, Silicosis respiratory fibrosis, Emphysema, Pneumonia, Tuberculosis

Cerebrovascular diseases: hemorrhage, embolism, infarction, Transient ischemic, Nerve root type cervical spondylosis, Meniere's syndrome, Cerebral arteriosclerosis, Sub-arachnoid hemorrhage

Chronic Liver diseases: Chronic hepatitis (virus B, C), Liver lesions, Obstructive jaundice, Alcoholic hepatitis, Fatty liver, Gall bladder disease.

---
